# Supplementary material
Source: PubMed Central journal article supplement (PMC3562824)
Supplement: 1217780110_pnas.201217780SI.pdf [file 1217780110_pnas.201217780SI.pdf]

# Supporting Information

Dessau and Modis 10.1073/pnas.1217780110

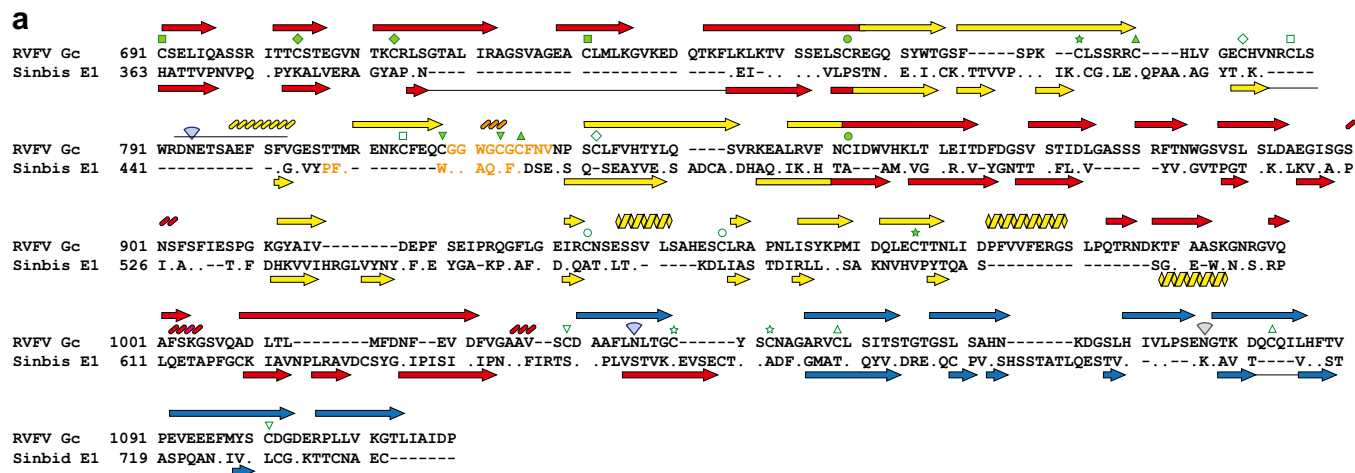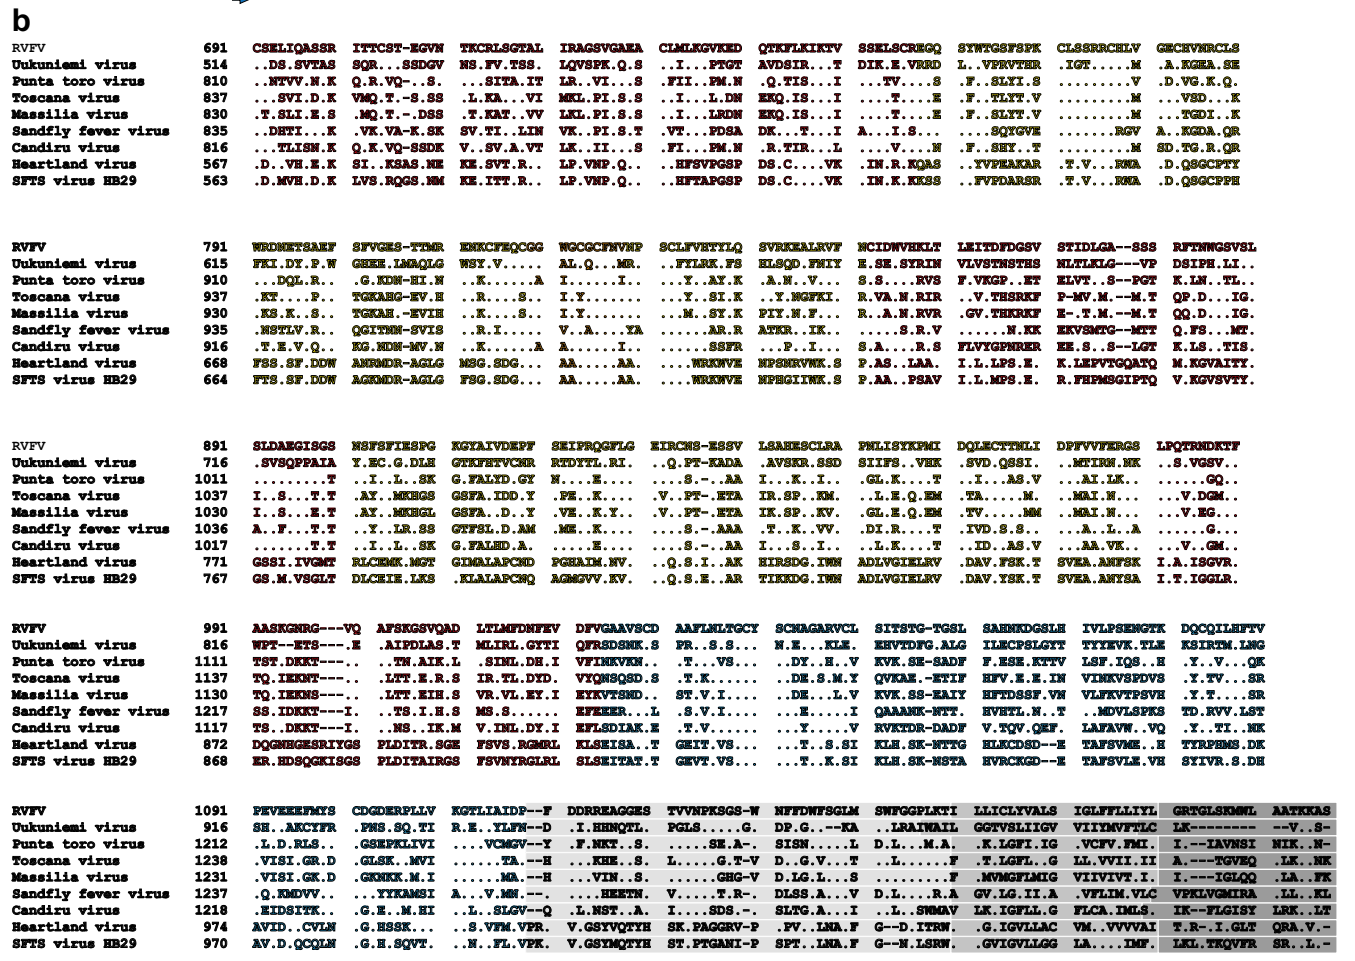

Fig. S1. Amino acid sequence alignments of Rift Valley fever virus (RVFV) glycoprotein G<sub>c</sub> and related proteins. (A) Structure-based protein sequence alignment of RVFV G<sub>c</sub> and Sindbis E1. The sequences were aligned based on a pairwise comparison of the corresponding crystal structures (PDB entries 4HJ1 and 3MUU). Conserved residues were replaced with a period. Domain colors are colored as in Fig. 1. Arrows denote β-strands; zigzags, α-helices; angled ellipsoids, α<sub>1</sub> helices. Disulfide bonds are indicated by pairs of matching green symbols. Light blue and gray sectors represent ordered and disordered glycans, respectively. (B) Multiple amino acid sequence alignment of G<sub>c</sub> from selected phleboviruses. Database sequence accession nos.: RVFV, gb:ABD38819.1; Uukuniemi virus, gi:38371706; Punta toro virus, gi:38371707; Toscana virus, gi:38371708; Massilia virus, gi:38371709; Sandfly fever virus, gi:38371710; Candiru virus, gi:38371711; Heartland virus, gi:38371712; SFTS virus HB29, gi:38371713.

Legend continued on following page

toro virus, gb:AAA47110.1; Toscana virus, gb:ABS85172.1; Massilia virus, gb:ACI24011.1; Sand fly fever virus, gb:AAA75043.1; Candiru virus, gb:AEA30045.1; Heartland virus, gb:AFP33393.1; severe fever with thrombocytopenia syndrome (SFTS) virus, gb:ADZ04471.1. Periods indicate conserved residues. Colors correspond to the domains of RVFV  $G_C$  as defined in Fig. 1A. The stem region (light gray shading), transmembrane anchor (medium gray shading), and cytoplasmic tail (dark gray shading) are missing in the RVFV  $G_C$  crystal structure.

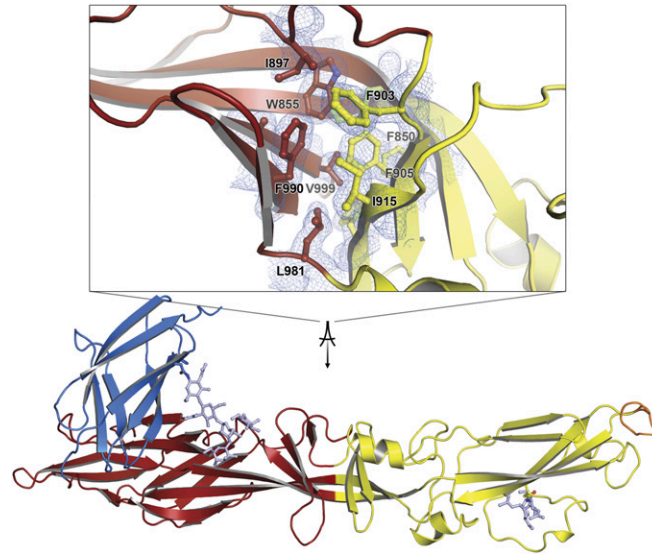

**Fig. S2.** The  $\beta$ -barrel between domains I and II of RVFV  $G_C$ . A close-up (*Inset*; viewed along the direction of the arrow) shows the hydrophobic core of the  $\beta$ -barrel. The environment is similar to the domain I-II interface of dengue E and could conceivably also accommodate a hydrophobic ligand. A  $2F_o - F_c$  electron density map contoured at  $1\sigma$  (blue mesh) is shown around the residues in the hydrophobic core (in ball-and-stick representation).

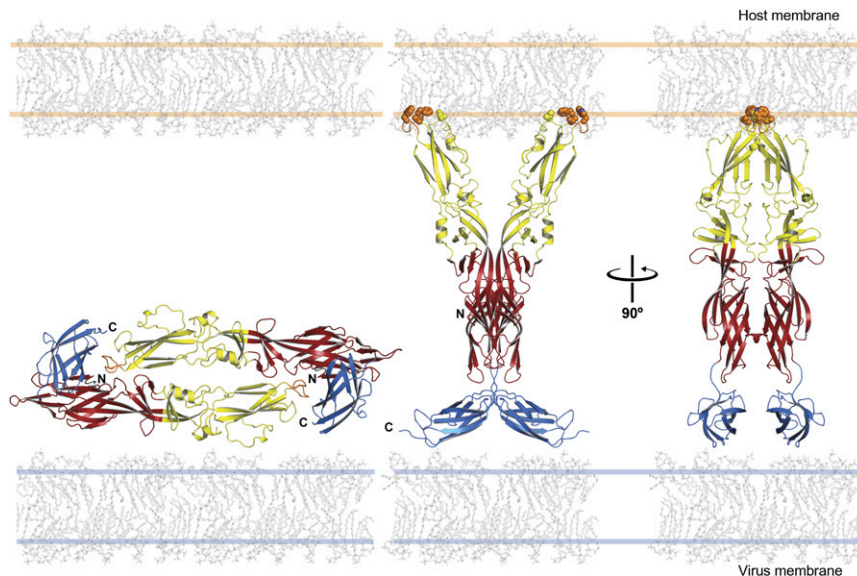

**Fig. S3.** Nonglycosylated  $G_C$  has an extended conformation that is likely to correspond to the so-called prefusion or prehairpin intermediate postulated for all fusion proteins. *Left*, the glycosylated  $G_C$  dimer structure shown with its dyad axis perpendicular to the membrane, as in the outer protein shell assembly proposed in Fig. 4. *Center and Right*, the nonglycosylated  $G_C$  structure. Hydrophobic residues in the fusion loop are shown as orange space-filling spheres. Extensive packing contacts around a crystallographic twofold symmetry axis result in a crystallographic dimer with a buried surface area at the dimer interface of  $1,180 \text{ \AA}^2$ . In the orientation imposed by the crystallographic dimer, Leu779 (yellow spheres), on a loop adjacent to the fusion loop, is positioned to insert into the target membrane along with the fusion loop. The positions of the N- and C termini are labeled *Left* and *Center*.

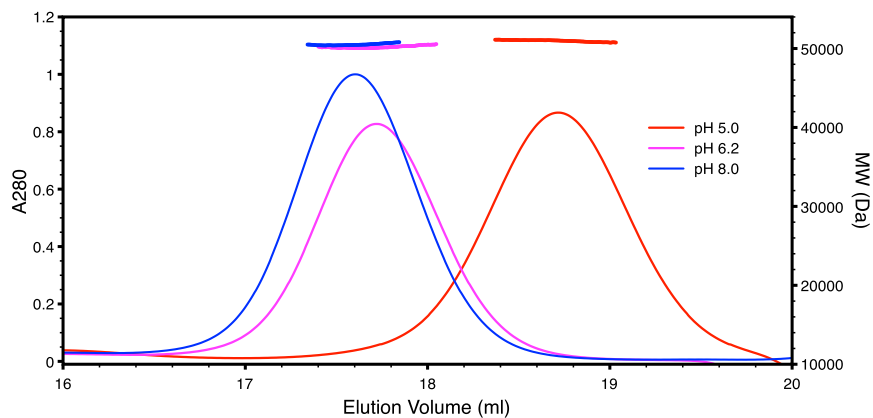

**Fig. S4.** RVFV  $G_C$  is a monomer in solution at different pH conditions. A total of 0.1 mL of  $G_C$  (1 g/L) was loaded onto a Superdex 200 (30/100) size-exclusion column preequilibrated with different buffers: red, 50 mM NaOAc pH 5.0; magenta, 50 mM MES pH 6.2; blue, 50 mM Tris-HCl pH 8.0. The eluate was analyzed for absorbance at 280 nm (Left y axis) and for multiangle light scattering, which was converted into molecular mass (Right y axis; *Materials and Methods*). Elution of  $G_C$  was significantly retarded due to nonspecific interactions of the protein with the dextran resin in all three buffers, although the effect was more pronounced in the pH 5 buffer. A similar effect was reported for flavivirus E proteins and attributed to exposure of the hydrophobic fusion loop (1).

1. Kanai R, et al. (2006) Crystal structure of West Nile virus envelope glycoprotein reveals viral surface epitopes. *J Virol* 80(22):11000–11008.

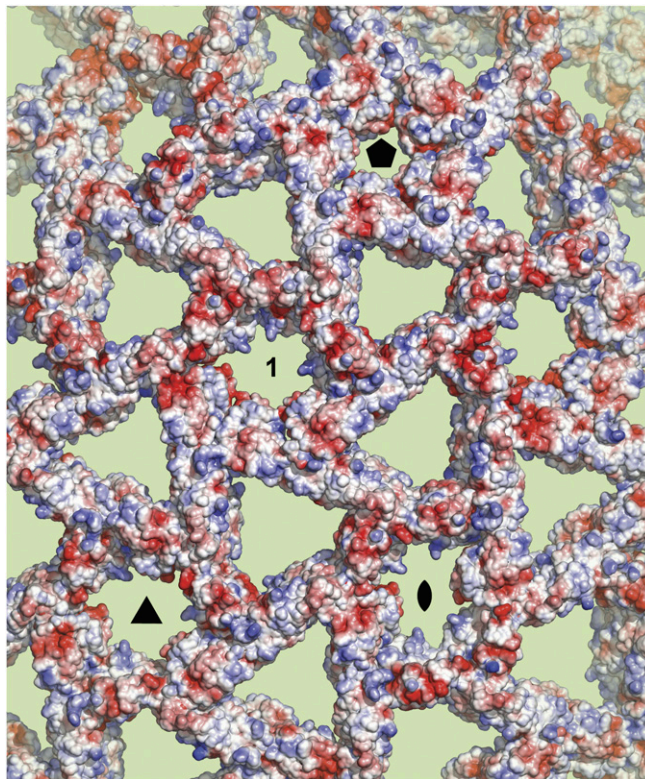

**Fig. S5.** Electrostatic surface potential of an icosahedral lattice of  $G_C$  assembled as shown in Fig. 4. The electrostatic potential of the outer surface of the  $G_C$  lattice is similar and slightly negative (red) around the (pseudo)-symmetry axes of each of the four types of capsomers: two-, three-, fivefold (labeled with standard symbols) and pseudo-sixfold, labeled "1." This was prepared with PyMOL using vacuum electrostatic potentials.

**Table S1. Quality-of-fit statistics for fitting the crystal structure of the RVFV G<sub>C</sub> dimer (PDB ID code 4HJ1) into the RVFV EM structure (EMDataBank ID code EMD-1550)**

|                                                                                                           | Manually fitted coordinates | Coordinates after fitting with UCSF Chimera |
|-----------------------------------------------------------------------------------------------------------|-----------------------------|---------------------------------------------|
| Nominal resolution of EM map (Å)                                                                          | 22                          | 22                                          |
| Contour level of EM map* (σ)                                                                              | 1.3                         | 1.3                                         |
| Resolution of map calculated from atomic coordinates for fitting/correlation measurement <sup>†</sup> (Å) | 20                          | 20                                          |
| CC between EM and calculated maps <sup>‡</sup>                                                            | 0.64                        | 0.77                                        |
| CAM between EM and calculated maps <sup>§</sup>                                                           | 0.26                        | 0.34                                        |
| CC with masked EM map used for fitting <sup>‡</sup>                                                       | 0.66                        | 0.80                                        |
| CAM with masked EM map used for fitting <sup>§</sup>                                                      | 0.27                        | 0.44                                        |
| CC with masked EM map, and icosahedral symmetry applied to calculated map during fitting                  | NA <sup>¶</sup>             | 0.88                                        |
| Total atoms per ASU <sup>  </sup>                                                                         | 40,074                      | 40,074                                      |
| Atoms per ASU outside the unmasked EM density                                                             | 14,020                      | 8,949                                       |
| Intra- and intermolecular contacts within the ASU <sup>**</sup>                                           | 35,038                      | 35,964                                      |
| Intra- and intermolecular clashes within the ASU <sup>††</sup>                                            | 2,055                       | 2,394                                       |
| Intermolecular contacts with other ASUs <sup>**</sup>                                                     | 8,080                       | 6,968                                       |
| Intermolecular clashes with other ASUs <sup>††</sup>                                                      | 3,080                       | 2,658                                       |

\*The map sampling density was set to 2 in UCSF Chimera.

<sup>†</sup>The map sampling density was set to 1.

<sup>‡</sup>CC, correlation coefficient for map-in-map fitting, defined as follows:  $CC = \langle \mathbf{u}, \mathbf{v} \rangle / (|\mathbf{u}| |\mathbf{v}|)$ , where  $\mathbf{u}$  and  $\mathbf{v}$  are vectors expressing the values of the fit and reference maps, respectively, at a certain point in space, and  $\langle \mathbf{u}, \mathbf{v} \rangle$  (the "overlap", or the inner product of vectors  $\mathbf{u}$  and  $\mathbf{v}$ ) is the sum over fit map grid points of the product of the fit map value and the reference map value at that point, determined by trilinear interpolation.

<sup>§</sup>CAM, correlation about mean map values, defined as  $CAM = \langle \mathbf{u} - \mathbf{u}_{ave}, \mathbf{v} - \mathbf{v}_{ave} \rangle / (|\mathbf{u} - \mathbf{u}_{ave}| |\mathbf{v} - \mathbf{v}_{ave}|)$ , where  $\mathbf{u}_{ave}$  is a vector with all components equal to the average of the components of  $\mathbf{u}$  and  $\mathbf{v}_{ave}$  is defined analogously. The CAM equals the cosine of the angle between the vectors (after subtraction of averages) and can range from -1 to 1, whereas the range of overlap (and hence CC) values depends on the scaling of the maps.

<sup>¶</sup>NA, not applicable.

<sup>||</sup>ASU, icosahedral asymmetric unit.

<sup>\*\*</sup>Contact defined as atom pairs more than four bonds apart with van der Waals overlap  $\geq -0.4$  Å.

<sup>††</sup>Clash defined as non-hydrogen-bonding atom pairs more than four bonds apart with van der Waals overlap  $\geq 0.6$  Å, or potentially hydrogen-bonding atom pairs more than four bonds apart with van der Waals overlap  $\geq 1.0$  Å.
